# Supplementary material
Source: MDPI journal article supplement (https://www.mdpi.com/2076-3417/6/1/7)
Supplement: s1 [file s1]

**Title:** NanoCell Electronic Memories**Author:** James M. Tour, Long Cheng,  
David P. Nackashi, et al**Publication:** Journal of the American  
Chemical Society**Publisher:** American Chemical Society**Date:** Oct 1, 2003

Copyright © 2003, American Chemical Society

Logged in as:

Hao Zhu

Account #:  
3000967317

LOGOUT

**PERMISSION/LICENSE IS GRANTED FOR YOUR ORDER AT NO CHARGE**

This type of permission/license, instead of the standard Terms & Conditions, is sent to you because no fee is being charged for your order. Please note the following:

- Permission is granted for your request in both print and electronic formats, and translations.
- If figures and/or tables were requested, they may be adapted or used in part.
- Please print this page for your records and send a copy of it to your publisher/graduate school.
- Appropriate credit for the requested material should be given as follows:  
"Reprinted (adapted) with permission from (COMPLETE REFERENCE CITATION). Copyright (YEAR) American Chemical Society." Insert appropriate information in place of the capitalized words.
- One-time permission is granted only for the use specified in your request. No additional uses are granted (such as derivative works or other editions). For any other uses, please submit a new request.

If credit is given to another source for the material you requested, permission must be obtained from that source.

BACK

CLOSE WINDOW
