# Supplementary material
Source: MDPI journal article supplement (https://www.mdpi.com/2076-3417/6/1/7)
Supplement: s1 [file s1]

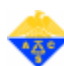ACS Publications  
Most Trusted. Most Cited. Most Read.

**Title:** Redox-Active Molecular  
Nanowire Flash Memory for  
High-Endurance and  
High-Density Nonvolatile  
Memory Applications

**Author:** Hao Zhu, Sujitra J.  
Pookpanratana, John E.  
Bonevich, et al

**Publication:** Applied Materials

**Publisher:** American Chemical Society

**Date:** Dec 1, 2015

Copyright © 2015, American Chemical Society

Logged in as:

Hao Zhu

Account #:  
3000967317

LOGOUT

## PERMISSION/LICENSE IS GRANTED FOR YOUR ORDER AT NO CHARGE

This type of permission/license, instead of the standard Terms & Conditions, is sent to you because no fee is being charged for your order. Please note the following:

- Permission is granted for your request in both print and electronic formats, and translations.
- If figures and/or tables were requested, they may be adapted or used in part.
- Please print this page for your records and send a copy of it to your publisher/graduate school.
- Appropriate credit for the requested material should be given as follows: "Reprinted (adapted) with permission from (COMPLETE REFERENCE CITATION). Copyright (YEAR) American Chemical Society." Insert appropriate information in place of the capitalized words.
- One-time permission is granted only for the use specified in your request. No additional uses are granted (such as derivative works or other editions). For any other uses, please submit a new request.

If credit is given to another source for the material you requested, permission must be obtained from that source.

BACK

CLOSE WINDOW
