# Supplementary material
Source: MDPI journal article supplement (https://www.mdpi.com/2076-3417/6/1/7)
Supplement: s1 [file s1]

**IEEE LICENSE  
TERMS AND CONDITIONS**

Dec 23, 2015

This is a License Agreement between Hao Zhu ("You") and IEEE ("IEEE") provided by Copyright Clearance Center ("CCC"). The license consists of your order details, the terms and conditions provided by IEEE, and the payment terms and conditions.

|                                                         |                                                                                                                                            |
|---------------------------------------------------------|--------------------------------------------------------------------------------------------------------------------------------------------|
| License Number                                          | 3774670847919                                                                                                                              |
| License date                                            | Dec 23, 2015                                                                                                                               |
| Licensed content publisher                              | IEEE                                                                                                                                       |
| Licensed content publication                            | Electron Devices, IEEE Transactions on                                                                                                     |
| Licensed content title                                  | Integration of Self-Assembled Redox Molecules in Flash Memory Devices                                                                      |
| Licensed content author                                 | Shaw, T.; Yu-Wu Zhong; Hughes, Kevin J.; Hou, Tuo-Hung; Raza, Hassan; Rajwade, S.; Bellfy, J.; Engstrom, James R.; Abruña, H.D.; Kan, E.C. |
| Licensed content date                                   | March 2011                                                                                                                                 |
| Volume number                                           | 58                                                                                                                                         |
| Issue number                                            | 3                                                                                                                                          |
| Type of Use                                             | Journal/Magazine                                                                                                                           |
| Requestor type                                          | non-commercial/non-profit                                                                                                                  |
| I am an IEEE member OR the author of this IEEE content. | yes                                                                                                                                        |
| IEEE Member ID                                          | 92094203                                                                                                                                   |
| Author of this new paper                                | Not specified                                                                                                                              |
| Format                                                  | print and electronic                                                                                                                       |
| Portion                                                 | figures/tables/graphs                                                                                                                      |
| Number of figures/tables /graphs                        | 4                                                                                                                                          |
| Figures/tables/graphs to be used                        | Figure 1, 2, 9, and 10 are to be used.                                                                                                     |
| In the following language(s)                            | Original language                                                                                                                          |
| Order reference number                                  | None                                                                                                                                       |
| Title of the article                                    | Novel Molecular Non-Volatile Memory: Application of Redox-Active Molecules                                                                 |
| Publication the new article is in                       | Applied Sciences                                                                                                                           |
| Publisher of the article                                | MDPI                                                                                                                                       |
| Author of new article                                   | Hao Zhu and Qiliang Li                                                                                                                     |

|                                       |                     |
|---------------------------------------|---------------------|
| Expected publication date             | Jan 2016            |
| Estimated size of the article (pages) | 17                  |
| Billing Type                          | Credit Card         |
| Credit card info                      | Visa ending in 2137 |
| Credit card expiration                | 01/2019             |
| Total                                 | 10.00 USD           |

Terms and Conditions

**TERMS AND CONDITIONS FOR REUSE OF IEEE MATERIAL SELECTED FOR LICENSING (THE "LICENSED MATERIAL") BASED ON "TYPE OF USE" AND "FORMAT" SELECTED FOR LICENSING BY USER**

By clicking "accept" in connection with completing this licensing transaction, you, as "User" do agree that the following terms and conditions apply to the use of the material you selected for licensing (the "Licensed Material"), along with the Billing and Payment terms and conditions established by Copyright Clearance Center, Inc. ("CCC"), at the time that you opened your RightsLink account and that are available at any time at

<http://myaccount.copyright.com>.

**Grant of Limited License**

IEEE hereby grants to you a non-exclusive, non-transferable worldwide license to use the Licensed Material in the "TYPE OF USE" and "FORMAT" that you outlined in the RightsLink form in connection with this transaction, and as outlined in accordance with the terms and conditions of this Agreement. This license does not include any photography, illustrations or advertisements that may appear in connection with the Licensed Material and does not extend to any revision or subsequent edition in which the Licensed Material may appear.

**Types of Use**

Complete terms and conditions and "TYPES OF USE" can be found in the License Agreement that will be available to you during the online order process. Certain terms of use in some IEEE licenses may take precedence over and supersede certain rights granted through RightsLink services. IEEE also reserves the right to restrict the types and total number of items that may be reused in any type of publication or medium. For additional information on the types of use available by IEEE and through RightsLink, please refer to [http://www.ieee.org/publications\\_standards/publications/rights/rightslink\\_usetypes.html](http://www.ieee.org/publications_standards/publications/rights/rightslink_usetypes.html).

**Authorized Use**

The license granted is granted for a one-time use for REPUBLICATION IN THE "TYPE OF USE" and "FORMAT" that you outlined in the RightsLink form in connection with this transaction, to be completed within one (1) year from the date upon which this license is effective, with a maximum distribution

equal to the number that you identified in the RightsLink form in connection with this transaction.

### **Restrictions on Use**

All uses not specifically authorized in this license and specified in the options for reusing IEEE Licensed Material available through the RightsLink service are prohibited, including (i) altering or modifying the Licensed Material in any manner, translating the Licensed Material into another language or creating any derivative work based on the Licensed Material; (ii) storing or archiving the Licensed Material in any electronic medium or in any form now invented or devised in the future, except where permission is granted to do so. For additional information on the types of use available by IEEE and through RightsLink, please refer to [http://www.ieee.org/publications\\_standards/publications/rights/rightslink\\_usetypes.html](http://www.ieee.org/publications_standards/publications/rights/rightslink_usetypes.html).

If the Licensed Material is altered or modified in any manner, it must be within the scope of the license granted and it must not alter the meaning of the Licensed Material or in any way reflect negatively on the IEEE or any writer of the Licensed Material.

Any use of the Licensed Material in any way that would be considered libelous, defamatory, abusive or obscene, in violation of any applicable law or the proprietary rights of a third party and or used in connection with the advertising or promotion of any product or service is also prohibited.

You agree to use your best efforts to prevent unauthorized use of the Licensed Material.

### **License Effective Only Upon Payment and Author Approval**

The license granted to you is effective only upon (i) receipt of full payment from you as provided in CCC's Billing and Payment terms and conditions and (ii) your having obtained the author's approval of your proposed use of the Licensed Material as described here.

### **IEEE Intellectual Property Rights**

You agree that IEEE is the owner of all right, title and interest in the Licensed Material and/or has the right to license the Licensed Material, including all copyright rights and other intellectual property rights under United States and international law.

### **Termination**

In the event that you breach any of these terms and conditions or any of CCC's Billing and Payment terms and conditions, the license granted herein shall be terminated immediately. Any use of the Licensed Material after termination, as well as any use of the Licensed Material beyond the scope of these terms and conditions, may constitute copyright infringement and IEEE reserves the right to take any and all action to protect its rights in the Licensed Material.

### **Copyright Notice**

You must include the following copyright and permission notice (WITH

DETAILS FILLED IN BY YOU) in connection with the Authorized Use of the Licensed Material:

© [Year] IEEE. Reprinted, with permission, from [complete publication information].

### **Warranty and Indemnity**

You warrant that you have all rights necessary to enter into this agreement and hereby indemnify and agree to hold harmless IEEE and CCC, and their respective officers, directors, employees and agents, from and against any and all claims arising out of your use of the Licensed Material other than as specifically authorized pursuant to this license.

### **Limited Warranty and Limitation of Liability**

THE RIGHT TO USE THE LICENSED MATERIAL IS GRANTED ON AN "AS IS" BASIS AND IEEE MAKES NO WARRANTY, EXPRESS OR IMPLIED WITH RESPECT TO THE LICENSED MATERIAL, INCLUDING ALL WARRANTIES OF QUALITY, ACCURACY AND/OR FITNESS FOR A PARTICULAR PURPOSE, AND IEEE SHALL NOT BE LIABLE UNDER ANY CIRCUMSTANCES FOR ANY LOSSES RESULTING FROM YOUR RELIANCE ON OR USE OF ANY INFORMATION CONTAINED IN THE LICENSED MATERIAL.

### **No Transfer or Assignment of License**

This license is personal to you and may not be sublicensed, assigned, or transferred by you to any other person without IEEE's written permission.

### **Objection to Contrary Terms**

IEEE hereby objects to any terms contained in any purchase order, acknowledgment, check endorsement or other writing prepared by you, which terms are inconsistent with these terms and conditions or CCC's Billing and Payment terms and conditions. These terms and conditions, together with CCC's Billing and Payment terms and conditions (which are incorporated herein), comprise the entire agreement between you and IEEE concerning this licensing transaction. In the event of any conflict between your obligations established by these terms and conditions and those established by CCC's Billing and Payment terms and conditions, these terms and conditions shall control.

### **Payment Terms**

If you would like to pay for this license now, please remit this license along with your payment made payable to "COPYRIGHT CLEARANCE CENTER" otherwise you will be invoiced within 48 hours of the license date. Payment should be in the form of a check or money order referencing your account number and this invoice number. Payments should be sent to the address noted below:

Copyright Clearance Center  
Dept 001  
P.O. Box 843006  
Boston, MA 02284-3006

Once you receive your invoice for this order, you may pay by credit card. Additional information is provided to users at the time their credit card order is placed.

For suggestions or comments regarding this order, contact RightsLink Customer Support: [customercare@copyright.com](mailto:customercare@copyright.com) or +1-855-239-3415 (toll free in the US) or +1-978-646-2777.

### **Comments and Questions for IEEE**

All comments and/or questions related to RightsLink permission services or comments and questions regarding IEEE licensing policies should be sent to [discoverservices@ieee.org](mailto:discoverservices@ieee.org). Users may also call Author Support & Content Discovery staff at 732.562.3965.

**A copy of both the license and these terms should be retained for your files.**

### **Other Terms and Conditions:**

Updated 12/2011 nbd-IEEE

Questions? [customercare@copyright.com](mailto:customercare@copyright.com) or +1-855-239-3415 (toll free in the US) or +1-978-646-2777.

---

---
