# Supplementary material
Source: MDPI journal article supplement (https://www.mdpi.com/2076-3417/6/1/7)
Supplement: s1 [file s1]

**AIP PUBLISHING LLC LICENSE  
TERMS AND CONDITIONS**

Dec 22, 2015

**All payments must be made in full to CCC. For payment instructions, please see information listed at the bottom of this form.**

|                                          |                                                                            |
|------------------------------------------|----------------------------------------------------------------------------|
| License Number                           | 3774550729477                                                              |
| Order Date                               | Dec 22, 2015                                                               |
| Publisher                                | AIP Publishing LLC                                                         |
| Publication                              | Applied Physics Letters                                                    |
| Article Title                            | Nanoscale molecular-switch devices fabricated by imprint lithography       |
| Author                                   | Yong Chen,Douglas A. A. Ohlberg,Xuema Li, et al.                           |
| Online Publication Date                  | Mar 4, 2003                                                                |
| Volume number                            | 82                                                                         |
| Issue number                             | 10                                                                         |
| Type of Use                              | Journal/Magazine                                                           |
| Requestor type                           | Author/Researcher/Scientist                                                |
| Format                                   | Print and electronic                                                       |
| Portion                                  | Figure/Table                                                               |
| Number of figures/tables                 | 1                                                                          |
| Title of new article                     | Novel Molecular Non-Volatile Memory: Application of Redox-Active Molecules |
| Publication the new article is in        | Applied Sciences                                                           |
| Publisher of new article                 | MDPI                                                                       |
| Author of new article                    | Hao Zhu and Qiliang Li                                                     |
| Expected publication date of new article | Jan 2016                                                                   |
| Estimated size of new article (pages)    | 17                                                                         |
| Total                                    | 0.00 USD                                                                   |

**Terms and Conditions**

AIP Publishing LLC -- Terms and Conditions: Permissions Uses

AIP Publishing LLC ("AIPP") hereby grants to you the non-exclusive right and license to use and/or distribute the Material according to the use specified in your order, on a one-time basis, for the specified term, with a maximum distribution equal to the number that you have ordered. Any links or other content accompanying the Material are not the subject of this license.

1. You agree to include the following copyright and permission notice with the reproduction of the Material: "Reprinted with permission from [FULL CITATION]. Copyright [PUBLICATION YEAR], AIP Publishing LLC." For an article, the copyright and permission notice must be printed on the first page of the article or book chapter. For photographs, covers, or tables, the copyright and permission notice may appear with the Material, in a footnote, or in the reference list.
2. If you have licensed reuse of a figure, photograph, cover, or table, it is your responsibility to ensure that the material is original to AIPP and does not contain the copyright of another

entity, and that the copyright notice of the figure, photograph, cover, or table does not indicate that it was reprinted by AIPP, with permission, from another source. Under no circumstances does AIPP, purport or intend to grant permission to reuse material to which it does not hold copyright.

3. You may not alter or modify the Material in any manner. You may translate the Material into another language only if you have licensed translation rights. You may not use the Material for promotional purposes. AIPP reserves all rights not specifically granted herein.
4. The foregoing license shall not take effect unless and until AIPP or its agent, Copyright Clearance Center, receives the Payment in accordance with Copyright Clearance Center Billing and Payment Terms and Conditions, which are incorporated herein by reference.
5. AIPP or the Copyright Clearance Center may, within two business days of granting this license, revoke the license for any reason whatsoever, with a full refund payable to you. Should you violate the terms of this license at any time, AIPP, AIP Publishing LLC, or Copyright Clearance Center may revoke the license with no refund to you. Notice of such revocation will be made using the contact information provided by you. Failure to receive such notice will not nullify the revocation.
6. AIPP makes no representations or warranties with respect to the Material. You agree to indemnify and hold harmless AIPP, AIP Publishing LLC, and their officers, directors, employees or agents from and against any and all claims arising out of your use of the Material other than as specifically authorized herein.
7. The permission granted herein is personal to you and is not transferable or assignable without the prior written permission of AIPP. This license may not be amended except in a writing signed by the party to be charged.
8. If purchase orders, acknowledgments or check endorsements are issued on any forms containing terms and conditions which are inconsistent with these provisions, such inconsistent terms and conditions shall be of no force and effect. This document, including the CCC Billing and Payment Terms and Conditions, shall be the entire agreement between the parties relating to the subject matter hereof.

This Agreement shall be governed by and construed in accordance with the laws of the State of New York. Both parties hereby submit to the jurisdiction of the courts of New York County for purposes of resolving any disputes that may arise hereunder.

Questions? [customer care@copyright.com](mailto:customer care@copyright.com) or +1-855-239-3415 (toll free in the US) or +1-978-646-2777.

---

---
